# Supplementary material for: Determinants of SARS-CoV-2 infection in Italian healthcare workers: a multicenter study
Source: PubMed Central journal article supplement (PMC7970984; doi:10.1038/s41598-021-85215-4), 2021-03-11
Supplement: 41598_2021_85215_MOESM1_ESM.pdf [file 41598_2021_85215_MOESM1_ESM.pdf]

Supplementary Table 1. Availability of information by center

| <i>Variable</i>             | <i>Bari</i> | <i>Bologna</i> | <i>Brescia</i> | <i>Genoa</i> | <i>Pisa</i> | <i>Turin</i> |
|-----------------------------|-------------|----------------|----------------|--------------|-------------|--------------|
| <u>Demographics</u>         |             |                |                |              |             |              |
| Sex                         | Y           | Y              | Y              | Y            | Y           | Y            |
| Age                         | Y           | Y              | Y              | Y            | Y           | Y            |
| <u>Occupation</u>           |             |                |                |              |             |              |
| Job title                   | Y           | Y              | Y              |              | Y           | Y            |
| Resident status             |             |                |                | Y            |             |              |
| COVID-19 department         | Y           | Y              | Y              |              |             | Y            |
| <u>Source of contact</u>    |             |                |                |              |             |              |
| Contact outside wp          |             | Y              | Y              |              | Y           |              |
| Contact at wp               |             | Y              | Y              |              |             | Y            |
| Contact with colleague      |             |                | Y              |              | Y           | Y            |
| Contact with patient        |             |                | Y              |              | Y           | Y            |
| <u>Use of PPE</u>           |             |                |                |              |             |              |
| Surgical mask               | Y           |                | Y              |              |             | Y            |
| FFP2/FFP3 mask              | Y           |                | Y              |              |             | Y            |
| Surgical or FFP mask        | Y           |                | Y              | Y            |             | Y            |
| Face shield                 | Y           |                | Y              | Y            |             | Y            |
| Gloves                      | Y           |                | Y              | Y            |             | Y            |
| Gown                        | Y           |                | Y              | Y            |             | Y            |
| Any PPE                     | Y           |                | Y              | Y            | Y           | Y            |
| Mask (contact)              |             |                |                |              |             | Y            |
| Mask (both HCW and contact) |             |                |                |              |             | Y            |
| <u>Symptoms</u>             |             |                |                |              |             |              |
| Fever                       |             |                | Y              | Y            | Y           | Y            |
| Cough                       |             |                | Y              | Y            | Y           | Y            |
| Dyspnea                     |             |                | Y              | Y            | Y           | Y            |
| Sore throat                 |             |                | Y              | Y            | Y           | Y            |
| Rhinitis                    |             |                | Y              | Y            |             | Y            |
| Ageusia or anosmia          |             |                | Y              | Y            | Y           | Y            |
| Diarrhea                    |             |                | Y              | Y            |             | Y            |
| Malaise                     |             |                | Y              |              | Y           |              |
| Fever, cough or dyspnea     |             | Y              | Y              | Y            | Y           | Y            |

wp, workplace; PPE, personal protection equipment; FFP, filtering facepiece
